# Supplementary material for: Proteome-Wide Identification of Lysine Propionylation in the Conidial and Mycelial Stages of Trichophyton rubrum
Source: Front Microbiol. 2019 Nov 13;10:2613. doi: 10.3389/fmicb.2019.02613 (PMC6861857; doi:10.3389/fmicb.2019.02613)
Supplement: Supplementary file 6 [file Table_5.xlsx]

## Sheet: conidia
Table S5. Subcellular location classification of the propionylated proteins.
Subcellular location	No. of protein	Protein IDs
nucleus	18	TERG_06621T1 TERG_05629T1 TERG_06437T0 TERG_00660T0 TERG_03909T0 TERG_08378T0 TERG_02631T0 TERG_04281T2 TERG_07743T0 TERG_03068T0 TERG_08242T0 TERG_04690T0 TERG_04775T0 TERG_06655T0 TERG_00727T0 TERG_04843T0 TERG_07156T3 TERG_04405T0
cytoplasm	14	TERG_01612T0 TERG_04580T0 TERG_12633T0 TERG_06744T0 TERG_06578T0 TERG_04928T0 TERG_00734T0 TERG_08422T0 TERG_01909T0 TERG_06794T0 TERG_00942T0 TERG_02412T0 TERG_02768T1 TERG_04402T1
mitochondria	12	TERG_06411T0 TERG_05184T0 TERG_02032T0 TERG_02290T0 TERG_05579T2 TERG_07342T0 TERG_06817T0 TERG_06056T0 TERG_04145T1 TERG_05579T0 TERG_04125T0 TERG_00633T0
plasma membrane	3	TERG_02508T0 TERG_06205T0 TERG_00475T1
cyto_nucl	3	TERG_07621T0 TERG_00865T2 TERG_03211T1
extracellular	2	TERG_02242T0 TERG_04335T0
cytoskeleton	2	TERG_03153T1 TERG_05518T0

## Sheet: mycelia
Subcellular location	No. of protein	Protein IDs
mitochondria	25	TERG_07236T0 TERG_06828T0 TERG_05184T0 TERG_04899T0 TERG_06689T0 TERG_07922T0 TERG_06224T0 TERG_12565T0 TERG_00708T0 TERG_01052T0 TERG_05029T0 TERG_12562T0 TERG_06858T0 TERG_06557T0 TERG_07149T0 TERG_08655T0 TERG_02032T0 TERG_05679T0 TERG_02007T0 TERG_01521T0 TERG_03762T0 TERG_03206T0 TERG_02728T0 TERG_04125T0 TERG_01258T0
nucleus	21	TERG_00283T0 TERG_06437T0 TERG_03116T0 TERG_02155T0 TERG_08968T0 TERG_02631T0 TERG_04281T2 TERG_02645T0 TERG_03351T0 TERG_12345T0 TERG_05770T0 TERG_06351T0 TERG_02973T0 TERG_05741T0 TERG_03679T0 TERG_01613T0 TERG_04405T0 TERG_06282T0 TERG_04639T0 TERG_03357T0 TERG_03123T0
cytoplasm	16	TERG_01272T0 TERG_05525T0 TERG_01041T0 TERG_05087T0 TERG_00499T0 TERG_03206T1 TERG_04402T1 TERG_06505T0 TERG_03300T1 TERG_04928T0 TERG_06172T0 TERG_00708T1 TERG_05621T0 TERG_01670T2 TERG_05145T3 TERG_00066T0
cyto_nucl	4	TERG_03155T0 TERG_03734T0 TERG_07166T0 TERG_03870T0
plasma membrane	2	TERG_02317T0 TERG_06237T0
extracellular	1	TERG_03738T0
endoplasmic reticulum	1	TERG_01573T0
