# Supplementary material for: Proteome-Wide Identification of Lysine Propionylation in the Conidial and Mycelial Stages of Trichophyton rubrum
Source: Front Microbiol. 2019 Nov 13;10:2613. doi: 10.3389/fmicb.2019.02613 (PMC6861857; doi:10.3389/fmicb.2019.02613)
Supplement: Supplementary file 8 [file Table_7.xlsx]

## Sheet: Table S7A
Table S7. Cross talk between the propionylation, acetylation and succinylation modified proteins and sites.
Table S7A. The proteins commonly modified by propionylation and acetylation.
Protein accession	Protein description
TERG_00633T0	40S ribosomal protein S9
TERG_00727T0	Involucrin repeat protein, putative
TERG_00865T2	Unknown
TERG_00942T0	Unknown
TERG_01612T0	Enolase/allergen Asp F 22
TERG_02242T0	Adhesin, putative
TERG_02631T0	Histone H2B
TERG_02768T1	6-phosphogluconate dehydrogenase, decarboxylating
TERG_03068T0	Tubulin-specific chaperone Rbl2, putative
TERG_03211T1	Actin cytoskeleton protein (VIP1), putative
TERG_03909T0	Unknown
TERG_04281T2	Woronin body protein HexA, putative
TERG_04402T1	Glyceraldehyde-3-phosphate dehydrogenase
TERG_04405T0	Histone H2A.Z
TERG_04580T0	Glutamate dehydrogenase
TERG_04775T0	Beta-hexosaminidase
TERG_04843T0	PHD finger and SET domain protein, putative
TERG_04928T0	Translation elongation factor EF-2 subunit, putative
TERG_05518T0	Short chain dehydrogenase, putative
TERG_06411T0	Histone acetyltransferase subunit (Yaf9), putative
TERG_06437T0	60S ribosomal protein L28
TERG_06744T0	Fructose-bisphosphate aldolase, class II
TERG_06794T0	NADH-quinone oxidoreductase Pst2, putative
TERG_06817T0	Mitochondrial ATPase inhibitor, putative
TERG_07156T3	Transcription regulator BDF1, putative
TERG_07342T0	Mitochondrial 2-oxodicarboxylate carrier protein, putative
TERG_08378T0	Unknown
TERG_12633T0	Conserved lysine-rich protein, putative
TERG_01909T0	Ribonuclease P complex subunit Pop2, putative
TERG_04125T0	Citrate synthase
TERG_06578T0	Translation elongation factor eEF-1 subunit gamma, putative
TERG_06655T0	Peptidyl-prolyl cis-trans isomerase, putative
TERG_07621T0	MSP domain protein
TERG_02032T0	ATP synthase subunit alpha
TERG_04145T1	ATP synthase subunit beta
TERG_05184T0	Glycine cleavage system H protein
TERG_05629T1	Chromosome segregation protein (Pcs1), putative
TERG_06056T0	L-PSP endoribonuclease family protein (Hmf1), putative
TERG_08422T0	Unknown
TERG_00499T0	Unknown
TERG_00708T0	Serine hydroxymethyltransferase
TERG_01052T0	Succinyl-CoA:3-ketoacid-coenzyme A transferase
TERG_01258T0	ATP synthase D chain, mitochondrial, putative
TERG_01272T0	2-methylcitrate synthase, mitochondrial
TERG_01613T0	Eukaryotic translation initiation factor 3 subunit J
TERG_02728T0	3-hydroxyisobutyrate dehydrogenase
TERG_03123T0	Histone H3
TERG_03155T0	Eukaryotic translation initiation factor 3 subunit G
TERG_03206T1	Heat shock protein 70 (Hsp70)
TERG_03679T0	Histone H4
TERG_03734T0	Pre-rRNA processing protein Rrp12, putative
TERG_04899T0	Ubiquitin-60S ribosomal protein L40
TERG_05029T0	Cytochrome b-c1 complex subunit Rieske, mitochondrial
TERG_05525T0	Unknown
TERG_05621T0	Peroxisomal multifunctional beta-oxidation protein (MFP), putative
TERG_05679T0	3-hydroxybutyryl-CoA dehydrogenase, putative
TERG_06172T0	60S ribosomal protein L12
TERG_06505T0	Molecular chaperone Hsp70
TERG_06557T0	50S ribosomal protein L12
TERG_07922T0	Aminomethyltransferase
TERG_08655T0	ADP,ATP carrier protein
TERG_00066T0	4-hydroxyphenylpyruvate dioxygenase
TERG_01041T0	Mitochondrial inner membrane AAA protease Yta12, putative
TERG_02973T0	Morphogenesis protein (Msb1), putative
TERG_03738T0	60S ribosomal protein L3
TERG_03762T0	Malate dehydrogenase
TERG_05087T0	AP-3 adaptor complex subunit beta, putative
TERG_05741T0	DUF1716 domain protein
TERG_06282T0	DNA N-glycosylase, putative
TERG_06689T0	Succinate dehydrogenase [ubiquinone] iron-sulfur subunit, mitochondrial
TERG_06828T0	Mitochondrial translocase complex component (Tim50), putative
TERG_06858T0	Peptidyl-prolyl cis-trans isomerase
TERG_07149T0	Aspartate aminotransferase
TERG_08968T0	RNA export mediator Gle1, putative
TERG_01573T0	Peptidyl-prolyl cis-trans isomerase
TERG_01670T2	Isocitrate dehydrogenase [NAD] subunit, mitochondrial
TERG_02007T0	Enoyl-CoA hydratase/isomerase family protein

## Sheet: Table S7B
Table S7B. The proteins commonly modified by propionylation and succinylation.
Protein accession	Protein description
TERG_00633T0	40S ribosomal protein S9
TERG_00865T2	Unknown
TERG_00942T0	Unknown
TERG_01612T0	Enolase/allergen Asp F 22
TERG_02412T0	HHE domain protein
TERG_02631T0	Histone H2B
TERG_03068T0	Tubulin-specific chaperone Rbl2, putative
TERG_04281T2	Woronin body protein HexA, putative
TERG_04402T1	Glyceraldehyde-3-phosphate dehydrogenase
TERG_04775T0	Beta-hexosaminidase
TERG_04928T0	Translation elongation factor EF-2 subunit, putative
TERG_06794T0	NADH-quinone oxidoreductase Pst2, putative
TERG_06817T0	Mitochondrial ATPase inhibitor, putative
TERG_07342T0	Mitochondrial 2-oxodicarboxylate carrier protein, putative
TERG_04125T0	Citrate synthase
TERG_06578T0	Translation elongation factor eEF-1 subunit gamma, putative
TERG_02032T0	ATP synthase subunit alpha
TERG_04145T1	ATP synthase subunit beta
TERG_05184T0	Glycine cleavage system H protein
TERG_06056T0	L-PSP endoribonuclease family protein (Hmf1), putative
TERG_00499T0	Unknown
TERG_00708T0	Serine hydroxymethyltransferase
TERG_01052T0	Succinyl-CoA:3-ketoacid-coenzyme A transferase
TERG_01258T0	ATP synthase D chain, mitochondrial, putative
TERG_01272T0	2-methylcitrate synthase, mitochondrial
TERG_01521T0	Acetyl-CoA-acetyltransferase, putative
TERG_02728T0	3-hydroxyisobutyrate dehydrogenase
TERG_03123T0	Histone H3
TERG_03206T1	Heat shock protein 70 (Hsp70)
TERG_03300T1	60S ribosomal protein L10
TERG_03679T0	Histone H4
TERG_05029T0	Cytochrome b-c1 complex subunit Rieske, mitochondrial
TERG_05679T0	3-hydroxybutyryl-CoA dehydrogenase, putative
TERG_06172T0	60S ribosomal protein L12
TERG_06224T0	Cytochrome c subunit Vb, putative
TERG_06505T0	Molecular chaperone Hsp70
TERG_08655T0	ADP,ATP carrier protein
TERG_00066T0	4-hydroxyphenylpyruvate dioxygenase
TERG_00708T1	Serine hydroxymethyltransferase
TERG_03738T0	60S ribosomal protein L3
TERG_03762T0	Malate dehydrogenase
TERG_06689T0	Succinate dehydrogenase [ubiquinone] iron-sulfur subunit, mitochondrial
TERG_06858T0	Peptidyl-prolyl cis-trans isomerase
TERG_07149T0	Aspartate aminotransferase
TERG_01573T0	Peptidyl-prolyl cis-trans isomerase
TERG_02007T0	Enoyl-CoA hydratase/isomerase family protein

## Sheet: Table S7C
Table S7C. The sites commonly modified by propionylation and acetylation.
Protein accession	site	Protein description
TERG_01612T0	5	Enolase/allergen Asp F 22
TERG_02242T0	80	Adhesin, putative
TERG_02631T0	70	Histone H2B
TERG_02631T0	20	Histone H2B
TERG_03211T1	137	Actin cytoskeleton protein (VIP1), putative
TERG_04281T2	211	Woronin body protein HexA, putative
TERG_04405T0	7	Histone H2A.Z
TERG_04405T0	13	Histone H2A.Z
TERG_04775T0	600	Beta-hexosaminidase
TERG_05518T0	117	Short chain dehydrogenase, putative
TERG_06411T0	176	Histone acetyltransferase subunit (Yaf9), putative
TERG_06744T0	244	Fructose-bisphosphate aldolase, class II
TERG_06794T0	59	NADH-quinone oxidoreductase Pst2, putative
TERG_06817T0	60	Mitochondrial ATPase inhibitor, putative
TERG_07342T0	84	Mitochondrial 2-oxodicarboxylate carrier protein, putative
TERG_08378T0	173	Unknown
TERG_12633T0	171	Conserved lysine-rich protein, putative
TERG_04125T0	401	Citrate synthase
TERG_06437T0	46	60S ribosomal protein L28
TERG_06578T0	247	Translation elongation factor eEF-1 subunit gamma, putative
TERG_02032T0	427	ATP synthase subunit alpha
TERG_02631T0	8	Histone H2B
TERG_05184T0	129	Glycine cleavage system H protein
TERG_06056T0	138	L-PSP endoribonuclease family protein (Hmf1), putative
TERG_00499T0	141	Unknown
TERG_01052T0	448	Succinyl-CoA:3-ketoacid-coenzyme A transferase
TERG_01258T0	80	ATP synthase D chain, mitochondrial, putative
TERG_01272T0	463	2-methylcitrate synthase, mitochondrial
TERG_01272T0	115	2-methylcitrate synthase, mitochondrial
TERG_02728T0	115	3-hydroxyisobutyrate dehydrogenase
TERG_03123T0	28	Histone H3
TERG_03123T0	57	Histone H3
TERG_03123T0	15	Histone H3
TERG_03206T1	58	Heat shock protein 70 (Hsp70)
TERG_03206T1	115	Heat shock protein 70 (Hsp70)
TERG_03206T1	525	Heat shock protein 70 (Hsp70)
TERG_03679T0	13	Histone H4
TERG_04402T1	74	Glyceraldehyde-3-phosphate dehydrogenase
TERG_04899T0	100	Ubiquitin-60S ribosomal protein L40
TERG_05621T0	475	Peroxisomal multifunctional beta-oxidation protein (MFP), putative
TERG_05679T0	81	3-hydroxybutyryl-CoA dehydrogenase, putative
TERG_06172T0	40	60S ribosomal protein L12
TERG_06437T0	27	60S ribosomal protein L28
TERG_08655T0	51	ADP,ATP carrier protein
TERG_00066T0	105	4-hydroxyphenylpyruvate dioxygenase
TERG_02032T0	537	ATP synthase subunit alpha
TERG_03738T0	321	60S ribosomal protein L3
TERG_05679T0	77	3-hydroxybutyryl-CoA dehydrogenase, putative
TERG_06282T0	29	DNA N-glycosylase, putative
TERG_06858T0	88	Peptidyl-prolyl cis-trans isomerase
TERG_07149T0	171	Aspartate aminotransferase
TERG_08655T0	280	ADP,ATP carrier protein
TERG_01272T0	214	2-methylcitrate synthase, mitochondrial
TERG_01573T0	120	Peptidyl-prolyl cis-trans isomerase
TERG_01670T2	10	Isocitrate dehydrogenase [NAD] subunit, mitochondrial

## Sheet: Table S7D
Table S7D. The sites commonly modified by propionylation and succinylation.
Protein accession	site	protein description
TERG_01612T0	5	Enolase/allergen Asp F 22
TERG_02412T0	81	HHE domain protein
TERG_04281T2	168	Woronin body protein HexA, putative
TERG_04281T2	211	Woronin body protein HexA, putative
TERG_04402T1	250	Glyceraldehyde-3-phosphate dehydrogenase
TERG_06794T0	59	NADH-quinone oxidoreductase Pst2, putative
TERG_06817T0	60	Mitochondrial ATPase inhibitor, putative
TERG_07342T0	84	Mitochondrial 2-oxodicarboxylate carrier protein, putative
TERG_04125T0	401	Citrate synthase
TERG_02032T0	427	ATP synthase subunit alpha
TERG_04145T1	150	ATP synthase subunit beta
TERG_05184T0	129	Glycine cleavage system H protein
TERG_06056T0	138	L-PSP endoribonuclease family protein (Hmf1), putative
TERG_00708T0	414	Serine hydroxymethyltransferase
TERG_01258T0	80	ATP synthase D chain, mitochondrial, putative
TERG_01272T0	463	2-methylcitrate synthase, mitochondrial
TERG_01272T0	115	2-methylcitrate synthase, mitochondrial
TERG_02728T0	115	3-hydroxyisobutyrate dehydrogenase
TERG_03123T0	57	Histone H3
TERG_03206T1	58	Heat shock protein 70 (Hsp70)
TERG_03300T1	23	60S ribosomal protein L10
TERG_05029T0	141	Cytochrome b-c1 complex subunit Rieske, mitochondrial
TERG_05679T0	81	3-hydroxybutyryl-CoA dehydrogenase, putative
TERG_06505T0	511	Molecular chaperone Hsp70
TERG_08655T0	40	ADP,ATP carrier protein
TERG_08655T0	51	ADP,ATP carrier protein
TERG_00066T0	105	4-hydroxyphenylpyruvate dioxygenase
TERG_00708T1	334	Serine hydroxymethyltransferase
TERG_02032T0	537	ATP synthase subunit alpha
TERG_03762T0	331	Malate dehydrogenase
TERG_05679T0	77	3-hydroxybutyryl-CoA dehydrogenase, putative
TERG_06689T0	166	Succinate dehydrogenase [ubiquinone] iron-sulfur subunit, mitochondrial
TERG_06858T0	88	Peptidyl-prolyl cis-trans isomerase
TERG_07149T0	171	Aspartate aminotransferase
TERG_08655T0	280	ADP,ATP carrier protein
TERG_01272T0	214	2-methylcitrate synthase, mitochondrial
TERG_01573T0	120	Peptidyl-prolyl cis-trans isomerase
TERG_02007T0	165	Enoyl-CoA hydratase/isomerase family protein

## Sheet: Table S7E
Table S7E. The proteins commonly modified by propionylation, acetylation and succinylation.
Protein accession	Protein description
TERG_00633T0	40S ribosomal protein S9
TERG_00865T2	Unknown
TERG_00942T0	Unknown
TERG_01612T0	Enolase/allergen Asp F 22
TERG_02631T0	Histone H2B
TERG_03068T0	Tubulin-specific chaperone Rbl2, putative
TERG_04281T2	Woronin body protein HexA, putative
TERG_04402T1	Glyceraldehyde-3-phosphate dehydrogenase
TERG_04775T0	Beta-hexosaminidase
TERG_04928T0	Translation elongation factor EF-2 subunit, putative
TERG_06794T0	NADH-quinone oxidoreductase Pst2, putative
TERG_06817T0	Mitochondrial ATPase inhibitor, putative
TERG_07342T0	Mitochondrial 2-oxodicarboxylate carrier protein, putative
TERG_04125T0	Citrate synthase
TERG_06578T0	Translation elongation factor eEF-1 subunit gamma, putative
TERG_02032T0	ATP synthase subunit alpha
TERG_04145T1	ATP synthase subunit beta
TERG_05184T0	Glycine cleavage system H protein
TERG_06056T0	L-PSP endoribonuclease family protein (Hmf1), putative
TERG_00499T0	Unknown
TERG_00708T0	Serine hydroxymethyltransferase
TERG_01052T0	Succinyl-CoA:3-ketoacid-coenzyme A transferase
TERG_01258T0	ATP synthase D chain, mitochondrial, putative
TERG_01272T0	2-methylcitrate synthase, mitochondrial
TERG_02728T0	3-hydroxyisobutyrate dehydrogenase
TERG_03123T0	Histone H3
TERG_03206T1	Heat shock protein 70 (Hsp70)
TERG_03679T0	Histone H4
TERG_05029T0	Cytochrome b-c1 complex subunit Rieske, mitochondrial
TERG_05679T0	3-hydroxybutyryl-CoA dehydrogenase, putative
TERG_06172T0	60S ribosomal protein L12
TERG_06505T0	Molecular chaperone Hsp70
TERG_08655T0	ADP,ATP carrier protein
TERG_00066T0	4-hydroxyphenylpyruvate dioxygenase
TERG_03738T0	60S ribosomal protein L3
TERG_03762T0	Malate dehydrogenase
TERG_06689T0	Succinate dehydrogenase [ubiquinone] iron-sulfur subunit, mitochondrial
TERG_06858T0	Peptidyl-prolyl cis-trans isomerase
TERG_07149T0	Aspartate aminotransferase
TERG_01573T0	Peptidyl-prolyl cis-trans isomerase
TERG_02007T0	Enoyl-CoA hydratase/isomerase family protein

## Sheet: Table S7F
Table S7F. The sites commonly modified by propionylation, acetylation and succinylation.
Protein accession	site	Protein description
TERG_01612T0	5	Enolase/allergen Asp F 22
TERG_04281T2	211	Woronin body protein HexA, putative
TERG_06794T0	59	NADH-quinone oxidoreductase Pst2, putative
TERG_06817T0	60	Mitochondrial ATPase inhibitor, putative
TERG_07342T0	84	Mitochondrial 2-oxodicarboxylate carrier protein, putative
TERG_04125T0	401	Citrate synthase
TERG_02032T0	427	ATP synthase subunit alpha
TERG_05184T0	129	Glycine cleavage system H protein
TERG_06056T0	138	L-PSP endoribonuclease family protein (Hmf1), putative
TERG_01258T0	80	ATP synthase D chain, mitochondrial, putative
TERG_01272T0	463	2-methylcitrate synthase, mitochondrial
TERG_01272T0	115	2-methylcitrate synthase, mitochondrial
TERG_02728T0	115	3-hydroxyisobutyrate dehydrogenase
TERG_03123T0	57	Histone H3
TERG_03206T1	58	Heat shock protein 70 (Hsp70)
TERG_05679T0	81	3-hydroxybutyryl-CoA dehydrogenase, putative
TERG_08655T0	51	ADP,ATP carrier protein
TERG_00066T0	105	4-hydroxyphenylpyruvate dioxygenase
TERG_02032T0	537	ATP synthase subunit alpha
TERG_05679T0	77	3-hydroxybutyryl-CoA dehydrogenase, putative
TERG_06858T0	88	Peptidyl-prolyl cis-trans isomerase
TERG_07149T0	171	Aspartate aminotransferase
TERG_08655T0	280	ADP,ATP carrier protein
TERG_01272T0	214	2-methylcitrate synthase, mitochondrial
TERG_01573T0	120	Peptidyl-prolyl cis-trans isomerase
